# Supplementary material
Source: Elsevier journal article supplement (https://www.sciencedirect.com/science/article/pii/S2173572722002272)
Supplement: mmc1 [file S2173572722002272:mmc1.pdf]

## Electronic Supplementary Material

**Supplementary Figure 1** Study flowchart.

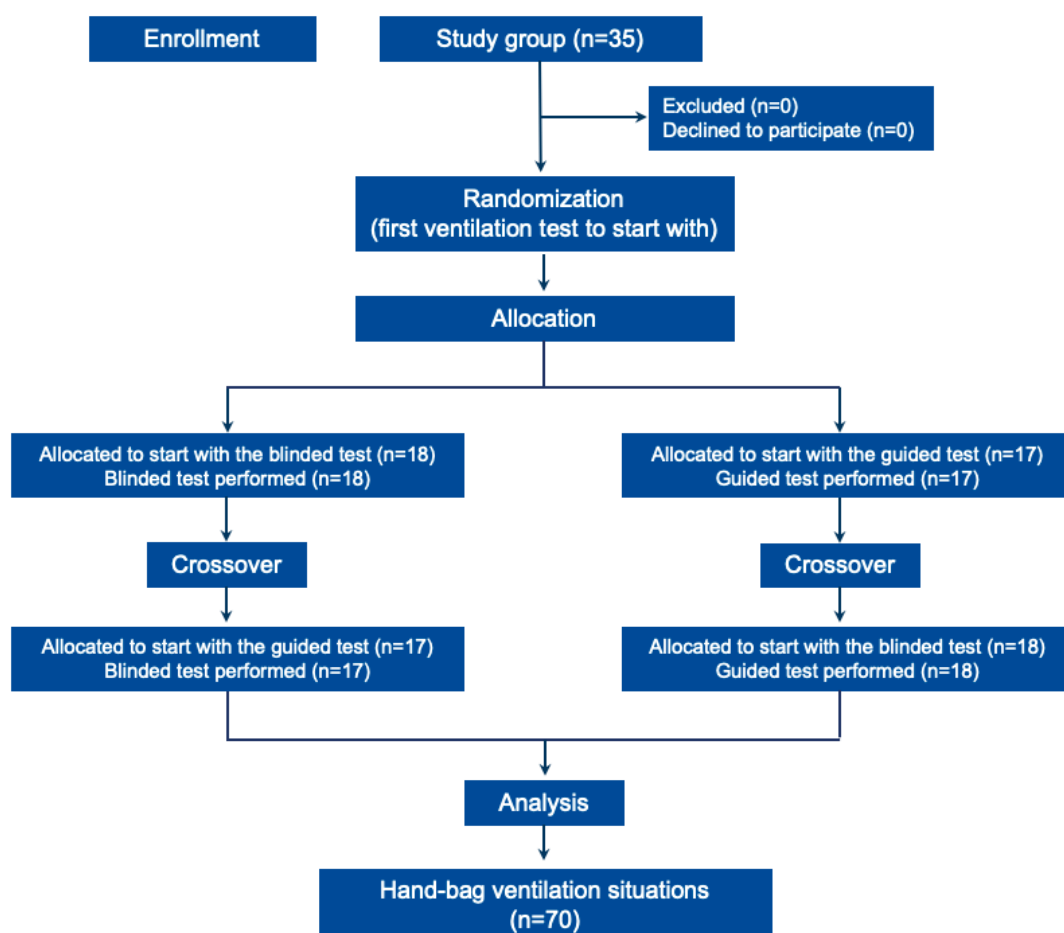

**Supplementary Figure 2** Hand-bag ventilation study setup.

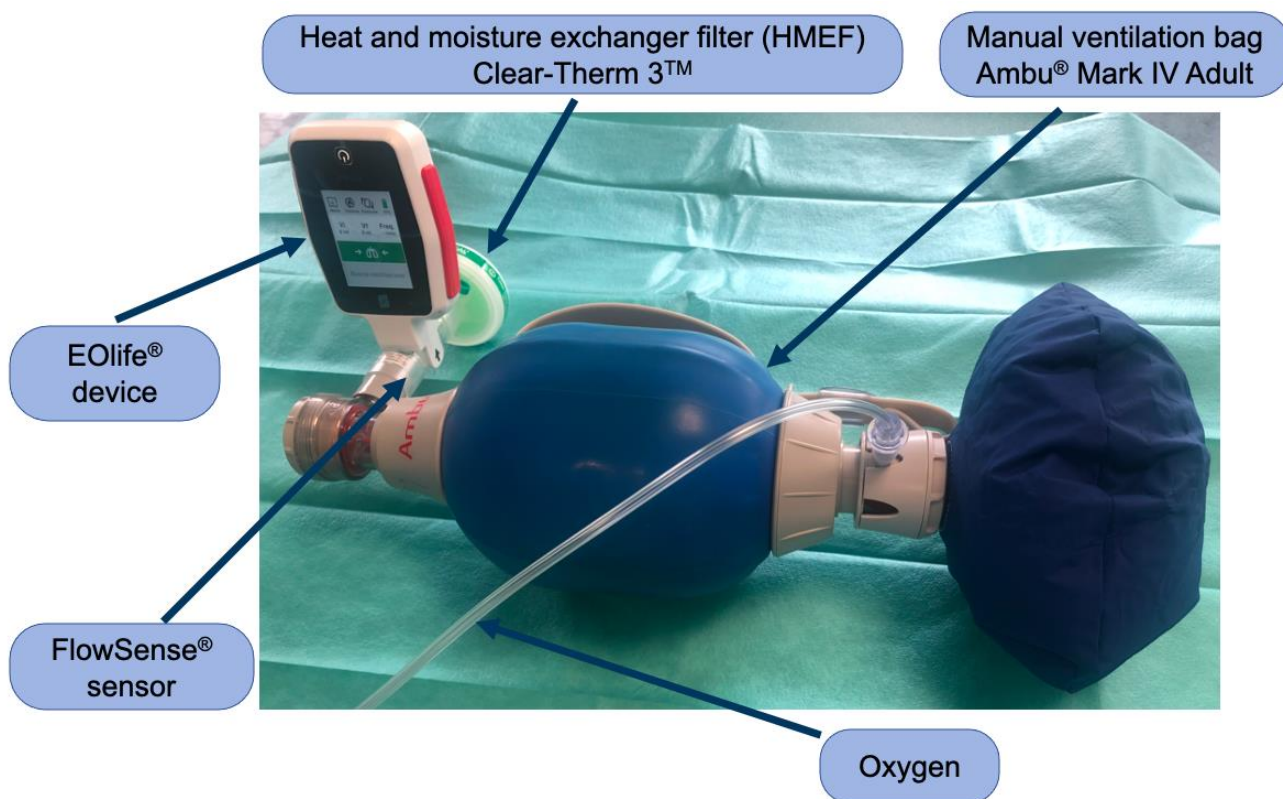

**Supplementary Table 1** Characteristics of Participants.

| Variable                              | Participants<br>(n=35) |
|---------------------------------------|------------------------|
| <b>Gender (%)</b>                     |                        |
| Female                                | 28 (80.0)              |
| Male                                  | 7 (20.0)               |
| <b>Age (years)</b>                    | 38.0 (9.6)             |
| <b>Weight (Kg)</b>                    | 67.31 (14.43)          |
| <b>Height (m)</b>                     | 1.66 (0.1)             |
| <b>Years of experience in the ICU</b> | 7.6 (7.7)              |

Data are expressed as the number (%) or mean (standard deviation)
